# Supplementary material for: A series of transition metal–organic frameworks: crystal structures, luminescence properties, and sensitizing for luminescent Ln(iii) ions in aqueous solution
Source: Royal Society of Chemistry journal article supplement (doi:10.1039/c6ra08419b), 2016-01-01
Supplement: c6ra08419b1.pdf [file c6ra08419b1.pdf]

## Supporting Information

### Table of Contents

1. **The solvent sensing experiment.** Well-ground **4** powder (3 mg) was immersed in different organic solvents (3 ml), treated by ultrasonication for approximately 30 min, and then aged for three days.
2. **The Ln(III) ion sensitizing experiment.** Well-ground **4** powder (3 mg) was immersed in Ln(III) (Sm(III), Eu(III), Tb(III), Dy(III)  $10^{-2}$  mol/L) aqueous solutions (3 ml), treated by ultrasonication for approximately 30 min, and then aged for three days.
3. The coordination modes of O-OBA and DPDC (a) and the configurations of BTB and BPP (b) (Scheme S1).
4. PXRD patterns of complexes **1-7** (Fig. S1).
5. 3D supramolecular arrangement of complexes **1-7** ( Fig. S2-8).
6. The TGA curves of complexes **1-7** (Fig. S9)
7. The solid state emission spectra of complexes and the free ligands (Fig. S10).
8. The PXRD patterns for **4** after immersing in different solvents (Fig. S11).
9. The luminescence intensity of four recyclable experiments of sensing for nitrobenzene(NB) in DMF(a) and sensitizing Tb(III) in water (b) (Fig. S12)
10. PXRD patterns of complex **4** after two and four recycles of sensing for nitrobenzene(NB) in DMF(a) and sensitizing Tb(III) in water (b) (Fig. S13)
11. Emission decay profiles of  $^5D_4$  Tb(III) in complex **4@Tb(III)/water** (Fig. S14).
12. The crystal data and structure refinement for complexes **1-7** (Table S1), Selected bond lengths [Å] and angles [°] for complexes **1-7** (Table S2).

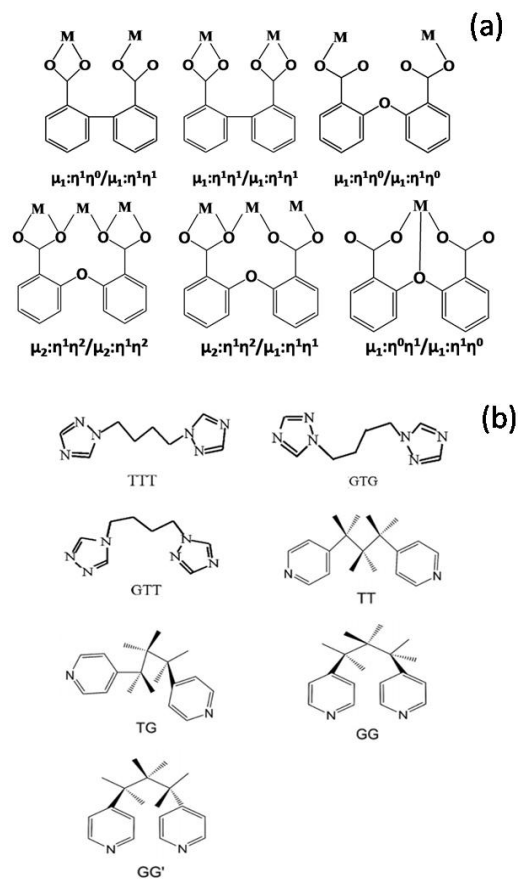

Scheme S1 The coordination modes of O-OBA and DPDC (a) and the configurations of BTB and BPP (b).

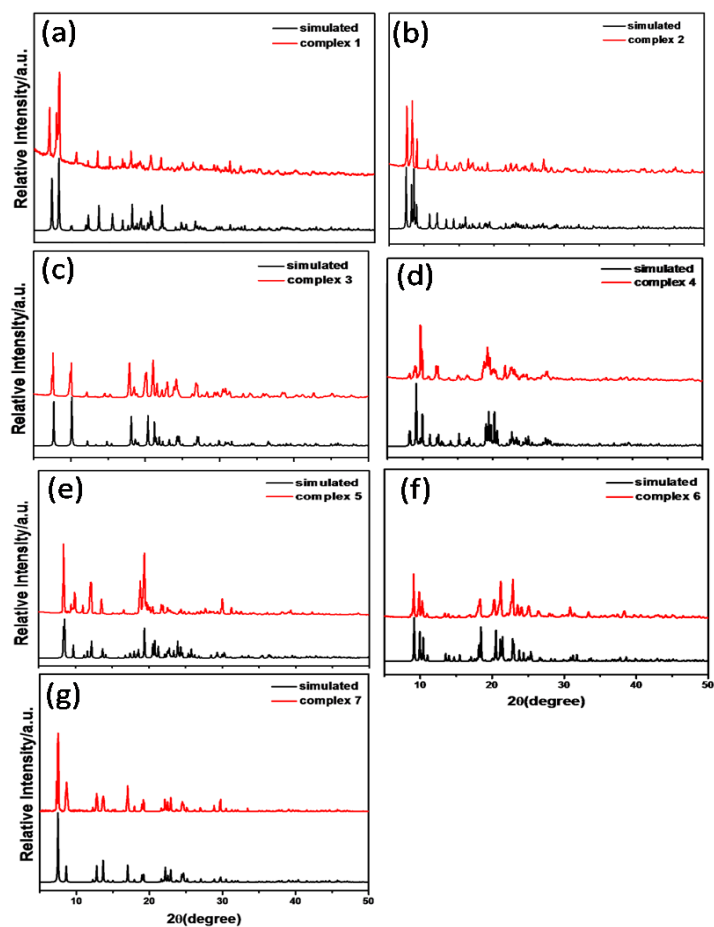

Fig. S1 PXRD patterns of complexes 1-7.

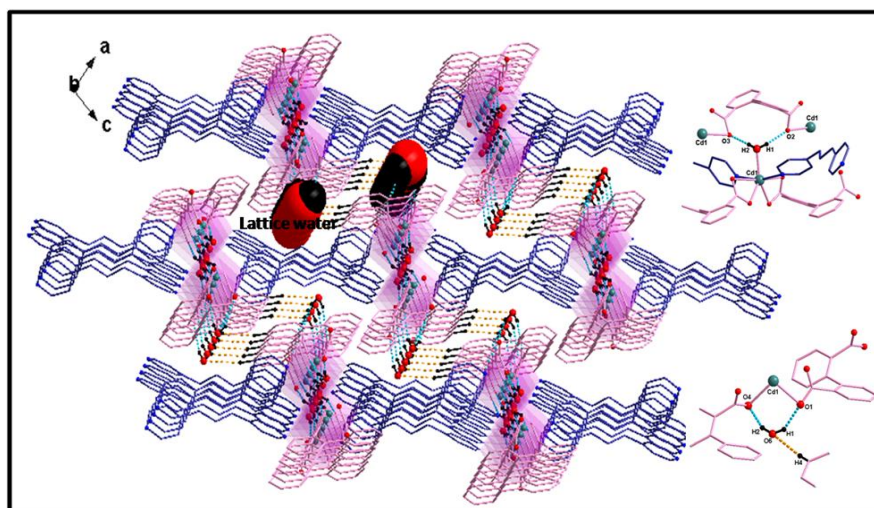

Fig. S2 3D supramolecular arrangement of complex 1.

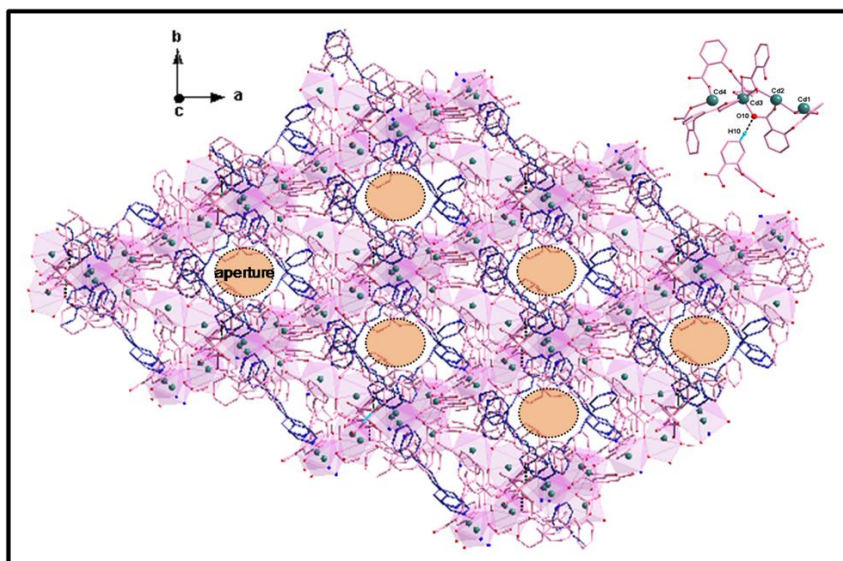

Fig S3 3D supramolecular arrangement of complex 2.

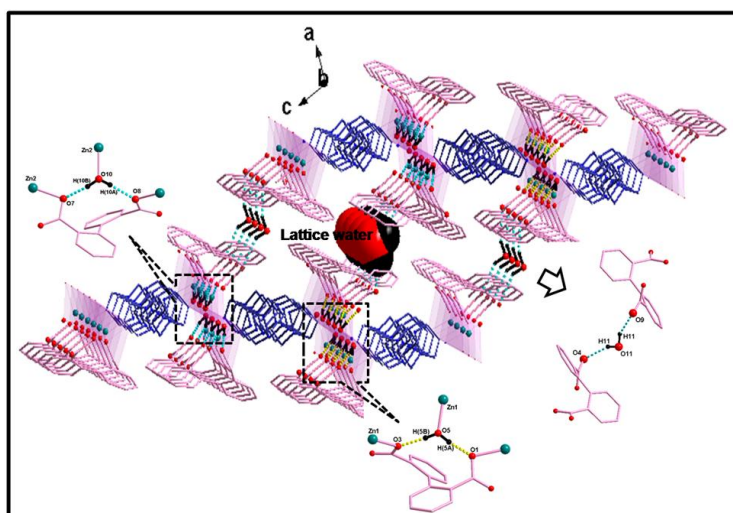

Fig S4 3D supramolecular arrangement of complex 3.

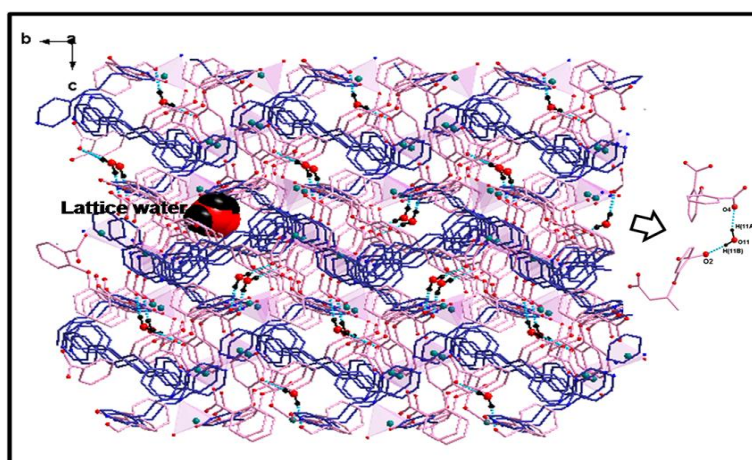

Fig S5 3D supramolecular arrangement of complex 4.

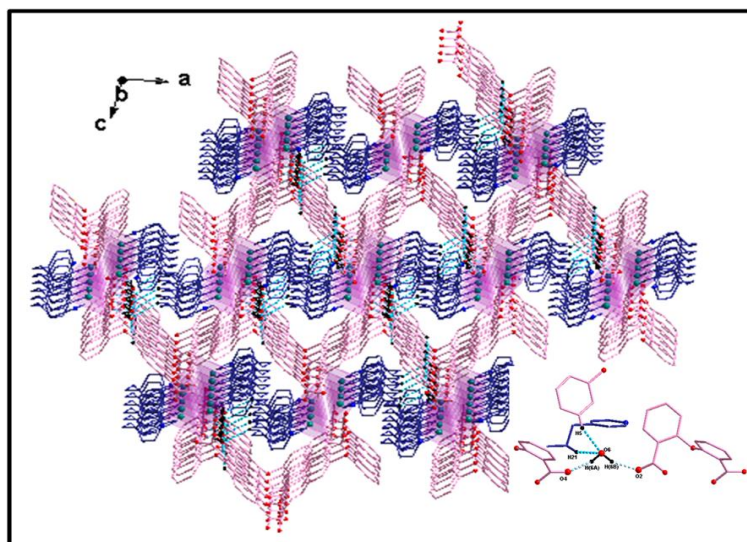

Fig S6 3D supramolecular arrangement of complex **5**.

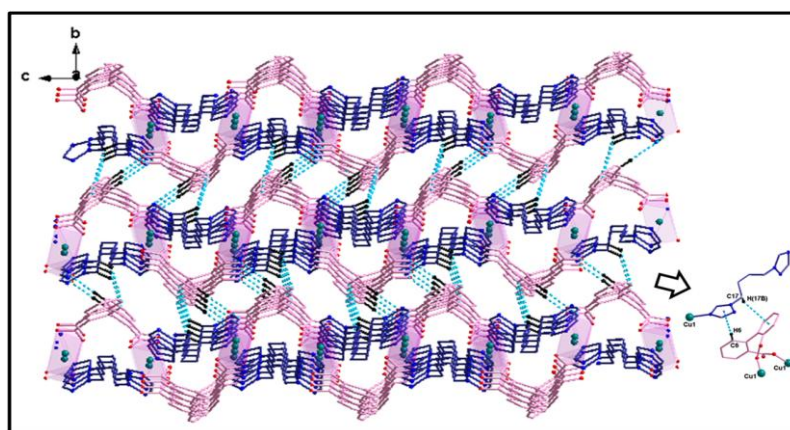

Fig S7 3D supramolecular arrangement of complex **6**.

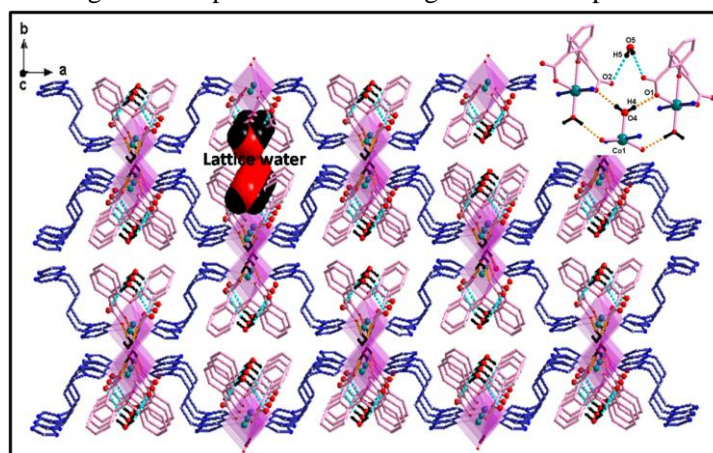

Fig S8 3D supramolecular arrangement of complex **7**.

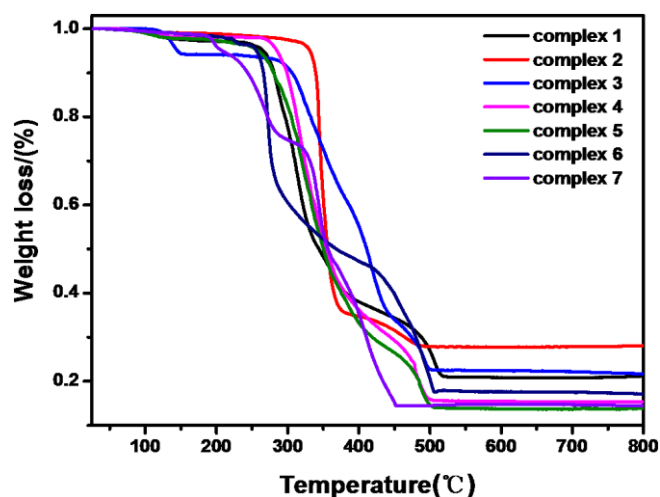

Fig. S9 The TGA curves of complexes 1-7.

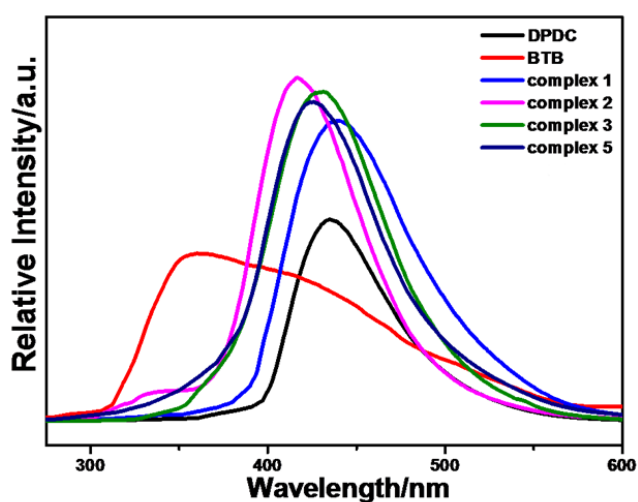

Fig. S10 The solid state emission spectra of complexes and the free ligands.

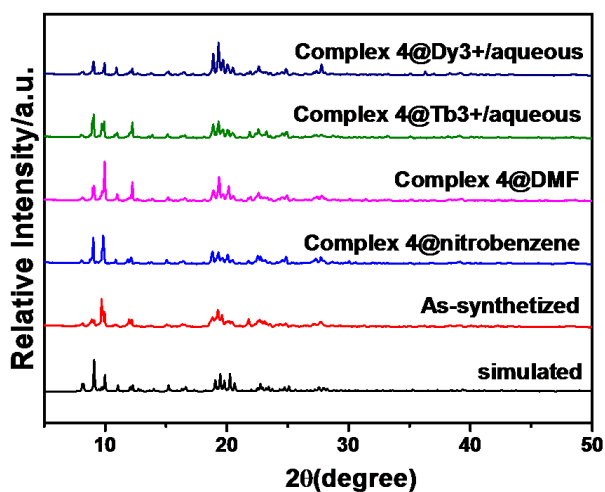

Fig. S11 PXRD patterns of complex 4 after immersing in different solvents.

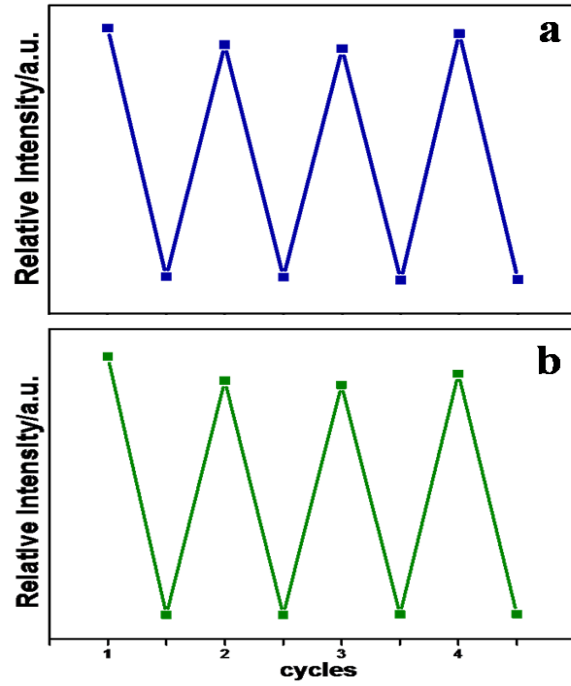

Fig. S12 The luminescence intensity of four recyclable experiments of sensing for nitrobenzene(NB) in DMF (a) and sensitizing Tb(III) in water (b).

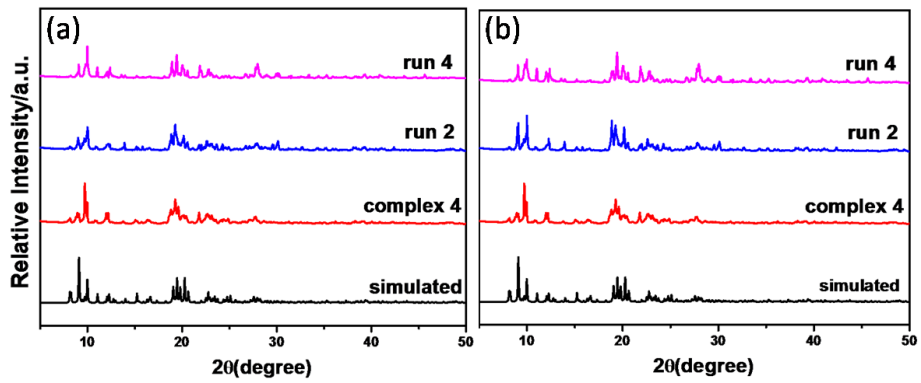

Fig. S13 PXRD patterns of complex 4 after two and four recycles of sensing for nitrobenzene(NB) in DMF (a) and sensitizing Tb(III) in water (b).

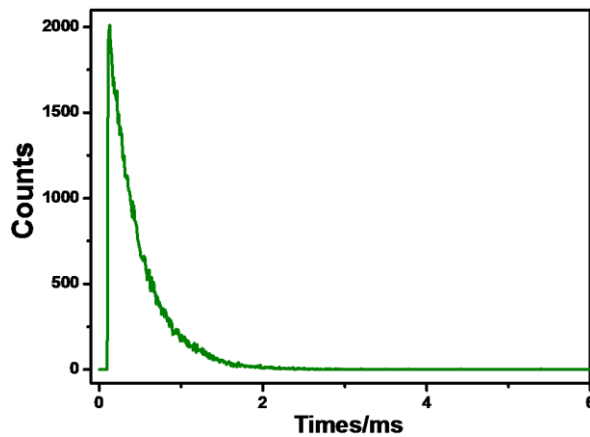

Fig. S14 Emission decay profiles of  $^5D_4$  Tb(III) in complex 4@Tb(III)/water.

Table S1 The crystal data and structure refinement for complexes **1-7**.

| Complex                                            | 1                                                                   | 2                                                                              | 3                                                                              | 4                                                                              | 5                                                                | 6                                                                 | 7                                                                               |
|----------------------------------------------------|---------------------------------------------------------------------|--------------------------------------------------------------------------------|--------------------------------------------------------------------------------|--------------------------------------------------------------------------------|------------------------------------------------------------------|-------------------------------------------------------------------|---------------------------------------------------------------------------------|
| Empirical formula                                  | C <sub>27</sub> H <sub>25</sub> CdN <sub>2</sub> O <sub>6</sub>     | C <sub>82</sub> H <sub>60</sub> Cd <sub>4</sub> N <sub>4</sub> O <sub>20</sub> | C <sub>36</sub> H <sub>34</sub> N <sub>6</sub> O <sub>11</sub> Zn <sub>2</sub> | C <sub>34</sub> H <sub>46</sub> N <sub>4</sub> O <sub>11</sub> Zn <sub>2</sub> | C <sub>27</sub> H <sub>24</sub> N <sub>2</sub> O <sub>6</sub> Zn | C <sub>22</sub> H <sub>20</sub> CuN <sub>6</sub> O <sub>4</sub>   | C <sub>44</sub> H <sub>46</sub> Co <sub>2</sub> N <sub>12</sub> O <sub>13</sub> |
| Formula weight                                     | 585.89                                                              | 1870.94                                                                        | 857.43                                                                         | 1057.69                                                                        | 537.85                                                           | 495.98                                                            | 1068.79                                                                         |
| Crystal system                                     | monoclinic                                                          | monoclinic                                                                     | monoclinic                                                                     | monoclinic                                                                     | monoclinic                                                       | monoclinic                                                        | monoclinic                                                                      |
| Space group                                        | <i>P2<sub>1</sub>/c</i>                                             | <i>Cc</i>                                                                      | <i>P2<sub>1</sub>/c</i>                                                        | <i>P2<sub>1</sub>/c</i>                                                        | <i>P2<sub>1</sub>/c</i>                                          | <i>P2<sub>1</sub>/c</i>                                           | <i>C2/c</i>                                                                     |
| <i>a</i> / Å                                       | 10.915(7)                                                           | 28.491(19)                                                                     | 12.429(4)                                                                      | 19.615(3)                                                                      | 9.2720(16)                                                       | 10.2363(14)                                                       | 20.666(9)                                                                       |
| <i>b</i> / Å                                       | 9.528(6)                                                            | 13.162(9)                                                                      | 7.950(2)                                                                       | 13.1022(19)                                                                    | 12.259(2)                                                        | 17.779(3)                                                         | 14.423(6)                                                                       |
| <i>c</i> / Å                                       | 24.559(15)                                                          | 21.213(14)                                                                     | 18.881(4)                                                                      | 18.765(3)                                                                      | 21.112(4)                                                        | 12.1196(17)                                                       | 8.174(5)                                                                        |
| $\beta$ / (°)                                      | 101.895(11)                                                         | 102.974(11)                                                                    | 112.685(6)                                                                     | 97.504(3)                                                                      | 101.067(3)                                                       | 109.452(2)                                                        | 97.093(8)                                                                       |
| Volume / Å <sup>3</sup>                            | 2499(3)                                                             | 7752(9)                                                                        | 1721.3(8)                                                                      | 4781.3(12)                                                                     | 2355.0(7)                                                        | 2079.7(5)                                                         | 2418(2)                                                                         |
| <i>Z</i>                                           | 4                                                                   | 4                                                                              | 4                                                                              | 4                                                                              | 4                                                                | 4                                                                 | 2                                                                               |
| Calculated density / mg · m <sup>-3</sup>          | 1.5573(19)                                                          | 1.603                                                                          | 1.647                                                                          | 1.469                                                                          | 1.517                                                            | 1.584                                                             | 1.468                                                                           |
| Absorption coefficient / mm <sup>-1</sup>          | 0.919                                                               | 1.157                                                                          | 1.468                                                                          | 1.071                                                                          | 1.09                                                             | 1.095                                                             | 0.762                                                                           |
| <i>F</i> (000)                                     | 1188                                                                | 3728                                                                           | 880                                                                            | 2184                                                                           | 1112                                                             | 1020                                                              | 1104                                                                            |
| Crystal size / mm                                  | 0.08 ×<br>0.10 ×<br>0.10                                            | 0.21 × 0.18<br>× 0.10                                                          | 0.45 × 0.25<br>× 0.18                                                          | 0.25 × 0.18<br>× 0.13                                                          | 0.18 × 0.15<br>× 0.10                                            | 0.12 × 0.08<br>× 0.06                                             | 0.350 × 0.200<br>× 0.200                                                        |
| $\theta$ Range for data collection / (°)           | 1.69-27.61                                                          | 1.71-25.25                                                                     | 1.71-25.24                                                                     | 1.87-25.25                                                                     | 1.93-25.25                                                       | 2.11-27.50                                                        | 1.726-27.717                                                                    |
| Limiting indices                                   | -14 ≤ <i>h</i> ≤ 13;<br>-12 ≤ <i>k</i> ≤ 12;<br>-23 ≤ <i>l</i> ≤ 31 | -34 ≤ <i>h</i> ≤ 34<br>-7 ≤ <i>k</i> ≤ 15<br>-25 ≤ <i>l</i> ≤ 25               | -13 ≤ <i>h</i> ≤ 14<br>-9 ≤ <i>k</i> ≤ 9<br>-22 ≤ <i>l</i> ≤ 22                | -19 ≤ <i>h</i> ≤ 23<br>-15 ≤ <i>k</i> ≤ 15<br>-22 ≤ <i>l</i> ≤ 21              | -9 ≤ <i>h</i> ≤ 11<br>-14 ≤ <i>k</i> ≤ 14<br>-24 ≤ <i>l</i> ≤ 25 | -13 ≤ <i>h</i> ≤ 13<br>-23 ≤ <i>k</i> ≤ 13<br>-15 ≤ <i>l</i> ≤ 15 | -25 ≤ <i>h</i> ≤ 26<br>-18 ≤ <i>k</i> ≤ 18<br>-10 ≤ <i>l</i> ≤ 7                |
| Reflections collected / unique                     | 5758/5758                                                           | 21064/13360                                                                    | 9911 / 5916                                                                    | 26725 / 8662                                                                   | 13127/4268                                                       | 13945 / 4757                                                      | 8254 / 2844                                                                     |
| [ <i>R</i> (int)=]                                 | 0.0000]                                                             | [ <i>R</i> (int) =                                                             | [ <i>R</i> (int) =                                                             | [ <i>R</i> (int) =                                                             | [ <i>R</i> (int) =                                               | [ <i>R</i> (int) =                                                | [ <i>R</i> (int) =                                                              |
|                                                    |                                                                     | 0.0454]                                                                        | 0.0412]                                                                        | 0.0876]                                                                        | 0.0672]                                                          | 0.0810]                                                           | 0.0421]                                                                         |
| Data / restraints / parameters                     | 5758/18/338                                                         | 13360/497/99<br>1                                                              | 5916 /10 /514                                                                  | 8662 / 2 / 648                                                                 | 4268 / 0 / 333                                                   | 4757 / 0 / 298                                                    | 2844 / 0 / 165                                                                  |
| Goodness-of-fit on <i>F</i> <sup>2</sup>           | 1.044                                                               | 0.97                                                                           | 1.02                                                                           | 0.948                                                                          | 1.037                                                            | 0.959                                                             | 1.061                                                                           |
| <i>R</i> <sub>1</sub> [ <i>I</i> > 2σ( <i>I</i> )] | 0.0663                                                              | 0.0605                                                                         | 0.1073                                                                         | 0.0466                                                                         | 0.0484                                                           | 0.0480                                                            | 0.0312                                                                          |



|                                                   |                  |                  |                  |                  |                  |                  |                  |
|---------------------------------------------------|------------------|------------------|------------------|------------------|------------------|------------------|------------------|
| wR <sub>2</sub> [I > 2sigma(I)]                   | 0.1744           | 0.1484           | 0.2637           | 0.0821           | 0.1027           | 0.0746           | 0.0809           |
| R <sub>1</sub> [all data]                         | 0.097            | 0.1232           | 0.0443           | 0.0855           | 0.0726           | 0.0879           | 0.0345           |
| wR <sub>2</sub> [all data]                        | 0.1765           | 0.158            | 0.0875           | 0.096            | 0.1027           | 0.0978           | 0.0809           |
| Largest diff. peak and hole / e · Å <sup>-3</sup> | 2.807 and -1.960 | 0.772 and -0.347 | 0.360 and -0.498 | 0.470 and -0.679 | 0.445 and -0.609 | 0.520 and -0.538 | 0.392 and -0.418 |

Table S2 Selected bond lengths [Å] and angles [°] for complex **1-7**

| <b>1</b>            |            |                     |            |
|---------------------|------------|---------------------|------------|
| Cd(1)-O(1)          | 2.475(5)   | Cd(1)-O(2)          | 2.377(5)   |
| Cd(1)-O(3)#1        | 2.630(5)   | Cd(1)-O(4)#1        | 2.311(5)   |
| Cd(1)-O(5)          | 2.287(5)   | Cd(1)-N(2)#2        | 2.331(5)   |
| Cd(1)-N(1)          | 2.379(6)   |                     |            |
| O(1)-Cd(1)-O(3)#1   | 131.02(15) | O(2)-Cd(1)-O(1)     | 53.99(15)  |
| O(2)-Cd(1)-O(3)#1   | 171.62(16) | O(4)#1-Cd(1)-O(3)#1 | 52.99(16)  |
| O(4)#1-Cd(1)-O(1)   | 88.48(17)  | O(4)#1-Cd(1)-O(2)   | 135.23(17) |
| O(5)-Cd(1)-O(1)     | 143.68(16) | O(5)-Cd(1)-O(2)     | 93.50(17)  |
| O(5)-Cd(1)-O(3)#1   | 79.51(16)  | O(5)-Cd(1)-O(4)#1   | 127.72(17) |
| O(4)#1-Cd(1)-N(2)#2 | 103.72(18) | O(5)-Cd(1)-N(1)     | 78.84(19)  |
| O(2)-Cd(1)-N(1)     | 83.84(17)  | O(4)#1-Cd(1)-N(1)   | 87.65(19)  |
| N(1)-Cd(1)-O(1)     | 109.20(18) | N(1)-Cd(1)-O(3)#1   | 99.18(17)  |
| N(2)#2-Cd(1)-O(1)   | 82.76(18)  | N(2)#2-Cd(1)-O(2)   | 95.45(17)  |
| N(2)#2-Cd(1)-O(3)#1 | 79.48(17)  | O(5)-Cd(1)-N(2)#2   | 85.21(19)  |
| N(2)#2-Cd(1)-N(1)   | 163.95(19) |                     |            |

Symmetry transformations used to generate equivalent atoms: #1 x,y-1,z; #2 x-1,-y+1/2,z-1/2.

| <b>2</b>      |           |               |           |
|---------------|-----------|---------------|-----------|
| Cd(1)-O(1)    | 2.428(12) | Cd(1)-O(2)    | 2.411(10) |
| Cd(1)-O(6)    | 2.336(11) | Cd(1)-O(7)    | 2.435(9)  |
| Cd(1)-O(15)#2 | 2.221(9)  | Cd(1)-O(19)#2 | 2.324(7)  |
| Cd(1)-O(20)#2 | 2.420(8)  | Cd(2)-O(9)    | 2.315(10) |
| Cd(2)-O(4)    | 2.340(7)  | Cd(2)-O(2)    | 2.346(10) |
| Cd(2)-O(7)    | 2.361(7)  | Cd(3)-O(10)   | 2.174(9)  |
| Cd(3)-O(11)   | 2.272(8)  | Cd(3)-O(16)   | 2.329(12) |
| Cd(3)-O(4)    | 2.349(8)  | Cd(3)-O(5)    | 2.379(9)  |
| Cd(3)-O(12)   | 2.491(12) | Cd(4)-O(14)   | 2.275(8)  |
| Cd(4)-O(19)   | 2.337(8)  | Cd(4)-O(11)   | 2.353(9)  |
| Cd(4)-O(17)   | 2.357(10) | Cd(2)-N(1)    | 2.256(11) |
| Cd(2)-N(4)#3  | 2.272(11) | Cd(4)-N(3)    | 2.267(9)  |
| Cd(4)-N(2)#4  | 2.268(10) |               |           |

|                       |          |                       |          |
|-----------------------|----------|-----------------------|----------|
| O(15)#2-Cd(1)-O(19)#2 | 99.6(3)  | O(15)#2-Cd(1)-O(6)    | 90.7(4)  |
| O(19)#2-Cd(1)-O(6)    | 101.3(3) | O(15)#2-Cd(1)-O(2)    | 82.1(3)  |
| O(19)#2-Cd(1)-O(2)    | 145.0(3) | O(6)-Cd(1)-O(2)       | 113.7(4) |
| O(15)#2-Cd(1)-O(20)#2 | 154.4(4) | O(19)#2-Cd(1)-O(20)#2 | 54.8(3)  |
| O(6)-Cd(1)-O(20)#2    | 95.2(3)  | O(2)-Cd(1)-O(20)#2    | 117.6(3) |
| O(15)#2-Cd(1)-O(1)    | 88.9(4)  | O(19)#2-Cd(1)-O(1)    | 92.6(3)  |
| O(6)-Cd(1)-O(1)       | 166.0(4) | O(2)-Cd(1)-O(1)       | 52.4(4)  |
| O(20)#2-Cd(1)-O(1)    | 91.2(3)  | O(15)#2-Cd(1)-O(7)    | 113.5(4) |
| O(19)#2-Cd(1)-O(7)    | 136.8(3) | O(6)-Cd(1)-O(7)       | 53.5(3)  |
| O(2)-Cd(1)-O(7)       | 69.8(3)  | O(20)#2-Cd(1)-O(7)    | 89.7(3)  |
| O(1)-Cd(1)-O(7)       | 114.2(4) | O(9)-Cd(2)-O(4)       | 82.3(3)  |
| O(9)-Cd(2)-O(2)       | 159.7(3) | O(4)-Cd(2)-O(2)       | 118.0(3) |
| O(9)-Cd(2)-O(7)       | 87.6(3)  | O(4)-Cd(2)-O(7)       | 169.6(3) |
| O(2)-Cd(2)-O(7)       | 72.1(3)  | O(10)-Cd(3)-O(11)     | 109.4(4) |
| O(10)-Cd(3)-O(16)     | 104.2(4) | O(11)-Cd(3)-O(16)     | 111.1(4) |
| O(10)-Cd(3)-O(4)      | 100.0(3) | O(11)-Cd(3)-O(4)      | 136.3(3) |
| O(16)-Cd(3)-O(4)      | 91.4(4)  | O(10)-Cd(3)-O(5)      | 152.2(4) |
| O(11)-Cd(3)-O(5)      | 87.8(3)  | O(16)-Cd(3)-O(5)      | 88.7(4)  |
| O(4)-Cd(3)-O(5)       | 54.5(3)  | O(10)-Cd(3)-O(12)     | 84.1(4)  |
| O(11)-Cd(3)-O(12)     | 54.2(3)  | O(16)-Cd(3)-O(12)     | 165.2(4) |
| O(4)-Cd(3)-O(12)      | 99.4(4)  | O(5)-Cd(3)-O(12)      | 89.3(4)  |
| O(14)-Cd(4)-O(19)     | 82.9(3)  | O(14)-Cd(4)-O(11)     | 91.9(3)  |
| O(19)-Cd(4)-O(11)     | 173.9(3) | O(14)-Cd(4)-O(17)     | 165.4(3) |
| O(19)-Cd(4)-O(17)     | 111.0(3) | O(11)-Cd(4)-O(17)     | 74.4(3)  |
| N(1)-Cd(2)-N(4)#3     | 174.7(4) | N(1)-Cd(2)-O(9)       | 88.1(4)  |
| N(4)#3-Cd(2)-O(9)     | 96.6(4)  | N(1)-Cd(2)-O(4)       | 91.4(3)  |
| N(4)#3-Cd(2)-O(4)     | 86.8(3)  | N(1)-Cd(2)-O(2)       | 91.8(4)  |
| N(4)#3-Cd(2)-O(2)     | 84.6(4)  | N(1)-Cd(2)-O(7)       | 90.8(3)  |
| N(4)#3-Cd(2)-O(7)     | 91.9(3)  | N(3)-Cd(4)-N(2)#4     | 179.5(4) |
| N(3)-Cd(4)-O(14)      | 93.9(3)  | N(2)#4-Cd(4)-O(14)    | 86.3(4)  |
| N(3)-Cd(4)-O(19)      | 87.9(3)  | N(2)#4-Cd(4)-O(19)    | 91.6(3)  |
| N(3)-Cd(4)-O(11)      | 89.2(3)  | N(2)#4-Cd(4)-O(11)    | 91.2(4)  |
| N(3)-Cd(4)-O(17)      | 91.1(4)  | N(2)#4-Cd(4)-O(17)    | 88.9(4)  |

Symmetry transformations used to generate equivalent atoms: #1  $x-1/2, y+1/2, z$ ; #2  $x+1/2, y-1/2, z$ ; #3  $x, y-1, z$ ; #4  $x-1/2, y-1/2, z$

---

**3**

---

|              |          |              |          |
|--------------|----------|--------------|----------|
| O(1)-Zn(1)   | 1.988(4) | O(2)-Zn(1)   | 2.490(4) |
| O(5)-Zn(1)   | 2.015(4) | O(6)-Zn(2)   | 2.471(4) |
| O(7)-Zn(2)   | 1.988(4) | O(10)-Zn(2)  | 2.009(3) |
| Zn(1)-O(3)#2 | 1.959(4) | Zn(2)-O(8)#1 | 1.954(4) |
| N(1)-Zn(1)   | 2.029(4) | N(6)-Zn(2)   | 2.023(4) |

|                   |            |                    |            |
|-------------------|------------|--------------------|------------|
| O(3)#2-Zn(1)-O(1) | 139.17(14) | O(3)#2-Zn(1)-O(5)  | 100.16(15) |
| O(1)-Zn(1)-O(5)   | 98.54(15)  | O(3)#2-Zn(1)-O(2)  | 100.54(13) |
| O(1)-Zn(1)-O(2)   | 57.72(14)  | O(5)-Zn(1)-O(2)    | 156.11(15) |
| O(8)#1-Zn(2)-O(7) | 137.01(14) | O(8)#1-Zn(2)-O(10) | 100.86(16) |
| O(7)-Zn(2)-O(10)  | 99.58(15)  | O(8)#1-Zn(2)-O(6)  | 98.70(14)  |
| O(7)-Zn(2)-O(6)   | 57.85(13)  | O(10)-Zn(2)-O(6)   | 157.24(15) |
| O(3)#2-Zn(1)-N(1) | 99.06(18)  | O(1)-Zn(1)-N(1)    | 112.24(17) |
| O(5)-Zn(1)-N(1)   | 101.60(15) | N(1)-Zn(1)-O(2)    | 86.77(14)  |
| O(8)#1-Zn(2)-N(6) | 95.47(17)  | O(7)-Zn(2)-N(6)    | 116.70(16) |
| O(10)-Zn(2)-N(6)  | 101.77(14) | N(6)-Zn(2)-O(6)    | 87.76(14)  |

Symmetry transformations used to generate equivalent atoms: #1 x,y-1,z; #2 x,y+1,z.

---

**4**

---

|                     |            |                   |            |
|---------------------|------------|-------------------|------------|
| O(1)-Zn(1)          | 1.937(2)   | Zn(1)-O(5)#2      | 1.957(2)   |
| O(6)-Zn(2)          | 1.935(2)   | Zn(2)-O(9)#5      | 1.964(2)   |
| N(1)-Zn(1)          | 2.022(3)   | N(2)-Zn(2)        | 2.050(3)   |
| N(3)-Zn(2)          | 2.045(3)   |                   |            |
| O(1)-Zn(1)-O(5)#2   | 104.36(10) | O(1)-Zn(1)-N(4)#4 | 117.01(12) |
| O(5)#2-Zn(1)-N(4)#4 | 110.07(10) | O(1)-Zn(1)-N(1)   | 97.29(11)  |
| O(5)#2-Zn(1)-N(1)   | 116.94(12) | N(4)#4-Zn(1)-N(1) | 110.80(11) |
| O(6)-Zn(2)-O(9)#5   | 143.67(12) | O(6)-Zn(2)-N(3)   | 95.61(11)  |
| O(9)#5-Zn(2)-N(3)   | 106.03(11) | O(6)-Zn(2)-N(2)   | 104.08(11) |
| O(9)#5-Zn(2)-N(2)   | 97.05(11)  | N(3)-Zn(2)-N(2)   | 107.17(12) |

Symmetry transformations used to generate equivalent atoms: #1 -x+2,y-3/2,-z+1/2; #2 -x+1,-y+3,-z; #3 -x+2,y-1/2,-z+1/2; #4 -x+2,y+3/2,-z+1/2.

---

**5**

---

|                   |            |                     |            |
|-------------------|------------|---------------------|------------|
| O(1)-Zn(1)        | 1.929(3)   | Zn(1)-O(5)#2        | 1.923(3)   |
| N(1)-Zn(1)        | 2.035(3)   | Zn(1)-N(2)#3        | 2.047(3)   |
| O(5)#2-Zn(1)-O(1) | 121.38(11) | O(5)#2-Zn(1)-N(1)   | 117.96(11) |
| O(1)-Zn(1)-N(1)   | 107.84(12) | O(5)#2-Zn(1)-N(2)#3 | 97.63(11)  |
| O(1)-Zn(1)-N(2)#3 | 98.16(11)  | N(1)-Zn(1)-N(2)#3   | 110.95(12) |

Symmetry transformations used to generate equivalent atoms: #1 x,y-1,z; #2 -x+1,-y+2,-z+1; #3 x,y+1,z.

---

**6**

---

|                   |           |                     |            |
|-------------------|-----------|---------------------|------------|
| Cu(1)-O(1)        | 1.976(2)  | Cu(1)-O(3)#1        | 1.944(2)   |
| Cu(1)-N(1)        | 1.982(2)  | Cu(1)-N(6)#2        | 1.988(2)   |
| O(3)#1-Cu(1)-O(1) | 179.62(9) | O(3)#1-Cu(1)-N(1)   | 91.09(10)  |
| O(1)-Cu(1)-N(1)   | 89.15(9)  | O(3)#1-Cu(1)-N(6)#2 | 87.82(9)   |
| O(1)-Cu(1)-N(6)#2 | 91.94(9)  | N(1)-Cu(1)-N(6)#2   | 178.78(11) |

Symmetry transformations used to generate equivalent atoms: #1  $x, -y+1/2, z+1/2$ ; #2  $x-1, -y+1/2, z+1/2$ .

| 7                   |            |                   |            |
|---------------------|------------|-------------------|------------|
| Co(1)-O(1)          | 2.0519(15) | Co(1)-O(3)        | 2.2236(17) |
| Co(1)-O(4)          | 2.0468(17) | Co(1)-O(1)#1      | 2.0519(15) |
| Co(1)-N(1)          | 2.1045(15) | Co(1)-N(1)#1      | 2.1045(15) |
| O(4)-Co(1)-O(1)#1   | 101.42(3)  | O(4)-Co(1)-O(1)   | 101.42(3)  |
| O(1)#1-Co(1)-O(1)   | 157.16(6)  | O(4)-Co(1)-N(1)#1 | 88.35(3)   |
| O(1)#1-Co(1)-N(1)#1 | 89.79(5)   | O(1)-Co(1)-N(1)#1 | 90.87(5)   |
| O(4)-Co(1)-N(1)     | 88.35(3)   | O(1)#1-Co(1)-N(1) | 90.87(5)   |
| O(1)-Co(1)-N(1)     | 89.79(5)   | N(1)#1-Co(1)-N(1) | 176.70(7)  |
| O(4)-Co(1)-O(3)     | 180.0      | O(1)#1-Co(1)-O(3) | 78.58(3)   |
| O(1)-Co(1)-O(3)     | 78.58(3)   | N(1)#1-Co(1)-O(3) | 91.65(3)   |
| N(1)-Co(1)-O(3)     | 91.65(3)   |                   |            |

Symmetry transformations used to generate equivalent atoms: #1  $-x, y, -z+3/2$ .
